# Supplementary material
Source: publisher figshare collection journal article supplement (https://gsajournals.figshare.com/ndownloader/files/13878971)
Supplement: Supplementary file 1 [file 13878971]

Table S3 Genomic islands in *M. dispar* GS01 genome

| Locus | Product | Gene | Protein length (aa) | Position |
| --- | --- | --- | --- | --- |
| genomic island from 199,019 to 205,115 | | | | |
| M.dispar-GS01_GM000154 | 30S ribosomal protein S4 | *rpsD* | 205 | 199019…199636 |
| M.dispar-GS01_GM000155 | Putative uncharacterized protein | - | 428 | 199890…201176 |
| M.dispar-GS01_GM000156 | ribose-5-phosphate isomerase B | *rpiB* | 162 | 201431…201919 |
| M.dispar-GS01_GM000157 | foramidopyrimidine DNA gycosylase | *mutM* | 274 | 201919…202743 |
| M.dispar-GS01_GM000158 | Ribulose-phosphate 3-epimerase | *rpe* | 217 | 203191…203844 |
| M.dispar-GS01_GM000159 | hypothetical protein, predicted transmembrane protein | - | 222 | 203786…204454 |
| M.dispar-GS01_GM000160 | hypothetical protein, predicted transmembrane protein | - | 222 | 204447…205115 |
| genomic island from 639,754 to 650,861 | | | | |
| M.dispar-GS01_GM000500 | - | - | 35 | 639754…639861 |
| M.dispar-GS01_GM000501 | hypothetical protein | - | 494 | 640177…641661 |
| M.dispar-GS01_GM000502 | serine protease | - | 699 | 641651…643750 |
| M.dispar-GS01_GM000503 | hypothetical protein | - | 494 | 644185…645669 |
| M.dispar-GS01_GM000504 | - | - | 43 | 645804…645935 |
| M.dispar-GS01_GM000505 | signal peptidase I | *lepB* | 108 | 646148…646474 |
| M.dispar-GS01_GM000506 | transposase, partial | - | 93 | 646671…646952 |
| M.dispar-GS01_GM000507 | hypothetical protein | - | 162 | 647208…647696 |
| M.dispar-GS01_GM000508 | heavy-metal transporting P-type ATPase | - | 681 | 648159…650204 |
| M.dispar-GS01_GM000509 | hypothetical protein | - | 70 | 650182…650394 |
| M.dispar-GS01_GM000510 | transposase | - | 115 | 650514…650861 |
